# Identification of signalling pathways involved in gill regeneration in zebrafish

Laura Cadiz, Maddison Reed, Simon Monis, Marie-Andrée Akimenko and Michael G. Jonz<sup>\*</sup>

Department of Biology, University of Ottawa, Canada

<sup>\*</sup> Author for correspondence: Michael G. Jonz, Ph.D.

Department of Biology, University of Ottawa, 30 Marie Curie Pvt.

Ottawa, ON K1N 6N5, Canada

p: +1 613-562-5800

f: + 1 613-562-5486

email: mjonz@uottawa.ca

**Keywords:** Regeneration, gill, blastema, Notch, BMP, FGF, sonic hedgehog, zebrafish

## Abstract

The occurrence of regeneration of the organs involved in respiratory gas exchange amongst vertebrates is heterogeneous. In some species of amphibians and fishes, the gills regenerate completely following resection or amputation; whereas in mammals, only partial, facultative regeneration of lung tissue occurs following injury. Given the homology between gills and lungs, the capacity of gill regeneration in aquatic species is of major interest in determining the underlying molecular or signalling pathways involved in respiratory organ regeneration. In the present study, we used adult zebrafish (*Danio rerio*) to characterize signalling pathways involved in the early stages of gill regeneration. Regeneration of the gills was induced by resection of gill filaments and observed over a period of up to 10 days. We screened for the effects on regeneration of the drugs, SU5402, dorsomorphin, and LY411575 that inhibit FGF, BMP or Notch signalling pathways, respectively. Exposure to each drug for 5 days significantly reduced regrowth of filament tips in regenerating tissue, compared to unresected controls. In separate experiments under normal conditions of regeneration, we used quantitative real-time PCR and observed an increased expression of genes encoding for the bone morphogenetic factor, Bmp2b, fibroblast growth factor, Fgf8a, a transcriptional regulator (Her6) involved in Notch signalling, and Sonic Hedgehog (Shha), in regenerating gills at 10 day post-

resection, compared to unresected controls. *In situ* hybridization confirmed that all four genes were expressed in regenerating gill tissue. This study implicates BMP, FGF, Notch and Shh signalling in gill regeneration in zebrafish.

## SUMMARY STATEMENT

Gill regeneration in zebrafish is mediated by multiple signalling pathways, including BMP, FGF, Notch and Sonic Hedgehog.

## INTRODUCTION

The fish gill is an organ that mediates multiple physiological processes, including exchange of O<sub>2</sub> and CO<sub>2</sub>, control of respiration by peripheral chemoreceptors, and ion exchange (Evans et al., 2005). In teleost fish, the gill (or branchial) arches give rise to primary filaments, which in turn produce numerous secondary lamellae, where gas exchange occurs (Hughes, 1984). The fine structure of the fish gill, including the diversity of cell types in the filaments and lamellae, has been well characterized (Wilson and Laurent, 2002). Although vastly different in morphology, the gill and mammalian lung are homologous structures that share similar cell types originating from endoderm-derived epithelium, and both develop from embryonic foregut (Gillis and Tidswell, 2017; Hockman et al., 2017; Kotton and Morrissey, 2014; Schittny, 2017). Unlike the lungs, which possess only facultative regenerative capacity (Reynolds et al., 2000; Beers and Morrissey, 2011; Kotton and Morrissey, 2014), the gills of adult fish are capable of complete regeneration of filaments and lamellae, though this has so far been demonstrated in a limited number of species (Schäfer, 1936; Jonz et al., 2015; Stolper et al., 2019; Mierzwa et al., 2020; Nguyen and Jonz, 2021). Given the evolutionary relationship between gills and lungs, investigation of the signalling pathways that orchestrate gill regeneration may enhance our understanding of the limitations imposed upon the regenerative potential of respiratory structures in other vertebrates.

Gill regeneration was first described for the external gills of the aquatic stage of *Necturus* (Eycleshymer, 1906). Regeneration of the internal gills in fish was later noted in goldfish (*Carassius auratus*; Schäfer, 1936) and more recently defined in the model vertebrates, zebrafish (*Danio rerio*; Jonz et al., 2015; Mierzwa et al., 2020; Nguyen and Jonz, 2021) and medaka

(*Oryzias latipes*; Stolper et al., 2019). Gill regeneration follows the same general phases as described for other structures, which include wound healing, blastema formation and structural regrowth (Nye et al., 2003; Stocum, 2017; Cadiz and Jonz, 2020). In zebrafish, formation of a blastema, composed of undifferentiated or mitotic cells, begins within 24 h of gill filament resection (Jonz et al., 2015; Mierzwa et al., 2020). There is much evidence in the literature on wound healing in the fish gill following tissue damage or infection (e.g. Burkhardt-Holm et al., 1999; Dutta et al., 1996; Hemalatha and Banerjee, 1997), but replacement of differentiated cell types and regrowth of normal gill structure has only been described in zebrafish and medaka (Stolper et al., 2019; Mierzwa et al., 2020; Nguyen and Jonz, 2021). Nevertheless, little is currently known about the signalling mechanisms that drive complete regeneration in the gills of any aquatic species, or of how widespread gill regeneration may be amongst fishes.

In the present study, we identified pathways involved in gill regeneration in zebrafish. We designed our approach based upon previous studies that have characterized pathways involved in regeneration, development or cell proliferation. We selected *fgf8a*, a gene that encodes a fibroblast growth factor (FGF) and is implicated in development of the branchial arches and head in zebrafish (Crump et al., 2004; Gebuijs et al., 2019). Two genes encoding bone morphogenetic protein (BMP), *bmp2b* and *bmp6*, were chosen for investigation based on evidence that they are involved in organogenesis (Chung et al., 2008) and fin regeneration (Smith et al., 2006), respectively. FGF and BMP also play a role in regeneration of the gills in axolotl (Saito et al., 2019). The genes, *jag1b* and *her6*, encoding a Notch ligand and effector, respectively, were selected because of their involvement in development of the branchial arches, or regeneration of the mandible, brain and caudal fin (Schebesta et al., 2006; Zuniga et al., 2010; Ueda et al., 2018; Kraus et al., 2022). Finally, a gene encoding Sonic Hedgehog signalling protein, *shha*, was investigated based on its role in regeneration of multiple tissues in zebrafish (Laforest et al., 1998; Armstrong et al., 2017; Dunaeva and Waltenberger, 2017; Thomas et al., 2018; Ueda et al., 2018; Iwasaki et al., 2018). Moreover, recent single-cell RNA-sequencing of the zebrafish gill revealed expression of genes encoding FGF, BMP, Notch and their receptors; as well as *shha* and *her6*, which may be involved in cell proliferation (Pan et al., 2022).

We tested the hypothesis that the selected genes and pathways described above were involved in gill filament regeneration in zebrafish. We developed an approach to identify functional roles for these pathways in regeneration by using pharmacological inhibition of

specific receptor types, resulting in a reduction of filament regrowth in regenerating gills. Selected gene expression analysis, using RT-PCR and *in situ* hybridization, confirmed a role for *fgf8a*, *bmp2b* and *her6* in gill regeneration in zebrafish. Gene expression analysis also demonstrated a potential role for *shha* in gill regeneration.

## MATERIALS AND METHODS

### Animals

Adult wild-type zebrafish (*Danio rerio*) were bred and maintained in the Laboratory for the Physiology and Genetics of Aquatic Organisms, University of Ottawa, at 28.5°C on a 14:10 h light:dark cycle in a closed system. Zebrafish were 5–7 months of age and a mix of both sexes. All animal handling and experimentation was approved by the University of Ottawa under protocol BL-3666 and performed in accordance with the Canadian Council on Animal Care.

### Gill resection and chemical exposure

Gill resection was performed following procedures described in Mierzwa et al. (2020). Briefly, zebrafish were lightly anesthetized using 0.1 mg ml<sup>-1</sup> tricaine (MS 222; Syndel Laboratories Ltd., Qualicum Beach, BC) in system water. Zebrafish were then immobilized in a Petri dish in phosphate-buffered solution containing (in mM) 137 NaCl, 15.2 Na<sub>2</sub>HPO<sub>4</sub>, 2.7 KCl, 1.5 KH<sub>2</sub>PO<sub>4</sub>, balanced at pH 7.8 and with MS 222. Approximately 0.2–0.3 mm of tissue was resected from a single gill filament of the anterior hemibranch of the first branchial arch. Zebrafish were returned to 1-litre tanks for recovery and maintained for up to 10 days post-resection (d.p.r.) to allow for gill filament regeneration. Zebrafish were identified and monitored individually by skin pattern recognition.

In some experiments, the effects of pharmacological inhibitors on gill regeneration were tested. Chemicals were selected based on their selectivity for inhibiting known pathways involved in regeneration. Immediately after gill resection, groups of up to 5 zebrafish were placed in two 1-litre tanks at 28.5°C and exposed to one of the following chemicals at concentrations tested in previous studies (sourced from MedChem Express LLC, Monmouth Junction, NJ, USA): 17 µmol l<sup>-1</sup> SU5402 (cat. no. HY-10407) to inhibit FGFR1 receptor activation (Poss et al., 2000; Saera-Vila et al., 2016); 12 µmol l<sup>-1</sup> dorsomorphin (DMD; cat. no.

HY-13418A), an inhibitor of BMP type I receptors (Yu et al., 2008); or 5  $\mu\text{mol l}^{-1}$  LY411575 (cat. no. HY-50752), a  $\gamma$  secretase inhibitor that blocks Notch signalling (Grotek et al., 2013). All drugs were first dissolved in dimethyl sulfoxide (DMSO) and added to system water. For controls, fish with resected gill filaments were maintained in water or 0.01% DMSO dissolved in water. Fish were exposed to drugs (or controls) until 5 d.p.r. with water changes every 24 h. No significant mortality was observed. Preliminary experiments demonstrated that observing specimens at 5 d.p.r. allowed for quantification of gill regeneration while minimizing the time during which zebrafish were exposed to drugs.

### **Imaging and assessment of gill regeneration**

The progress of regrowth of the gill filament tip in control or drug treatment groups was assessed as a measure of gill regeneration. At 5 d.p.r., each individual was anesthetized and immobilized (as described above) a second time for live imaging. In this manner, gross morphological changes in filament structure were compared to filament structure immediately after resection. To enhance contrast of gill filaments during imaging, a small piece of tape coated with white nail polish was inserted between the two rows of filaments (hemibranchs) of the first branchial arch. Live imaging was performed using an AxioZoom.V16 with Apotome and AxioCam 506 (Zeiss, Jena, Germany).

Zebrafish were then prepared for measurement of the filament tip in regenerating gills. Animals were euthanized with 0.3 mg  $\text{ml}^{-1}$  tricaine in system water. The gill arch that had previously undergone filament resection was removed and washed with cold PBS. Tissue was fixed in 4% paraformaldehyde in PBS at 4°C overnight and then rinsed with PBS. Gill arches were mounted on glass slides in glycerol with a coverslip. The tips of gill filaments were examined using a Nikon A1 microscope (Nikon Instruments Inc., Tokyo, Japan).

Image J (Schneider et al., 2012) was used for image preparation and for measurement of filament tip projection area. For each specimen, a region of interest was manually selected around the filament tip and area was calculated using the Analyze-Measure tool.

### **Reverse transcription quantitative polymerase chain reaction (RT-PCR)**

A previous study reported the greatest increase in the number of chemoreceptors and nerve fibres in regenerating gill filaments at 10 d.p.r. (Mierzwa et al. 2020). We therefore

collected tissue at 10 d.p.r. for experiments assessing expression of genes involved in cell proliferation and regrowth. The first gill arch was removed from 8 zebrafish that had undergone the filament resection procedure. The first gill arch was also removed from 8 intact zebrafish for control. Gill arches were placed in cryotubes, frozen in liquid N<sub>2</sub> and placed at –80°C until used. Total RNA from whole gill arches was extracted using Trizol reagent (Thermo Fisher Scientific) and quantified using a NanoDrop 2000c UV-Vis Spectrophotometer (Thermo Fisher Scientific). cDNA was generated using QuantiTect Reverse Transcription Kit (Qiagen Inc., Toronto, ON, Canada) following manufacturers protocol. To check for genomic DNA contamination, a no-template negative control and a no reverse transcriptase negative control were included. mRNA gene expression of *fgf8a*, *bmp2b*, *bmp6*, *her6*, *jag1b* and *shha* in single gill arches was assessed by real time reverse transcription PCR (RT-PCR) using SsoAdvanced Universal SYBR Green Supermix (Bio-Rad, Mississauga, ON, Canada). Expression of reference gene elongation factor 1a (*ef1a*) was stable between gills of control and regenerating groups and was therefore used to normalize mRNA expression for all genes. Standard curves were generated using a serial dilution of pooled cDNA to optimize primer reaction conditions. Each RT-PCR reaction included an initial step at 98°C to activate the enzymes in the mix, followed by 40 repeats of a denaturation step at 95°C and an annealing/extension step at the optimized temperature for each primer pair. A melt step from 66°C to 95°C in 0.5°C increments was included at the end of the reaction to check the specificity of the amplicon produced. Each biological sample was run in duplicate, and the relative abundance of mRNA was calculated using the  $\Delta\Delta C_t$  method (Livak and Schmittgen, 2001). See Table S1 for RT-PCR primer sequences.

### ***In situ* hybridization**

At 10 d.p.r., the first branchial arches were removed from zebrafish and prepared for whole-mount *in situ* hybridization using a protocol modified from Thisse and Thisse (2008). For each gene, gills from 3 zebrafish were sampled. Each gill arch was used for staining of regenerating filaments, as well as adjacent unresected filaments, which were used as intrinsic controls. Briefly, gills were fixed overnight in 4% paraformaldehyde at 4°C (Sigma, St. Louis, MO, USA) in diethyl pyrocarbonate in PBS (PBS-DEPC). The following day, gills were washed with PBS-DEPC, dehydrated in 100% methanol and stored at –20°C until used. Gills were then washed in PBS-DEPC and digested in 10 mg ml<sup>-1</sup> proteinase K for 45 min at room temperature.

Hybridization of probes was carried out at 67°C. After washes, samples were incubated at 4°C overnight with anti-digoxigenin (DIG) at 1:2,000 conjugated to alkaline phosphatase. Detection of hybridized RNA probes was achieved with 225 µg ml<sup>-1</sup> nitro blue tetrazolium (NBT) and 175 µg ml<sup>-1</sup> 5-bromo 4-chloro 3-indolyl phosphate (BCIP) in Tris buffer. Staining was stopped when labelling was detected. Images were captured using an upright microscope (Axiophot, Zeiss, Jena, Germany) equipped with a DP-70 colour CCD camera (Olympus, Tokyo, Japan) and prepared using ImageJ. Image contrast was adjusted using CorelDraw (Corel Corp., Ottawa, Canada).

Antisense RNA probes for *bmp2b* (1.3 kb; Laforest et al., 1998), *bmp6* (705 bp; Smith et al., 2006), *fgf8a* (1.5 kb; Zhang et al., 2010) and *shha* (2.5 kb; Smith et al., 2006) were synthesized, as previously described. A probe for *her6* (1.3 kb) was synthesized using a clone containing the complete coding sequence of *her6* (Dharmacon Clone ID: 4789975). The clone was linearized with BamHI and transcribed *in vitro* using T7 RNA polymerase. A 816 bp fragment of *jag1b* cDNA was amplified using *jag1b* forward 5'-CACGTGACGAGTTCTTTGGA-3' and *jag1b* reverse 5'-CTGTGGCCATAGGTAAGTGG-3' primers. This fragment was then used as a template to amplify a fragment including a T7 binding site at its end using the *jag1b*-L forward 5'-CACGTGACGAGTTCTTTGGACATTAT-3' and *jag1b*-T7 reverse 5'-CATTATGCTGAGTGATATCCTGTGGCCATAGGTAAGTGGTTTAG-3' primers. The *jag1b* probe was then transcribed *in vitro* using this template and T7 RNA polymerase.

### Statistical analysis

For assessment of gill regeneration, statistical analysis was performed using Prism v.8.4.3 (GraphPad Software, San Diego, CA). Data sets were tested for normality using the D'Agostino and Pearson test. Significant differences between treatments were analyzed by one-way ANOVA, and Tukey's test ( $P < 0.05$ ) was performed for *post-hoc* comparisons. Data are shown as means ± S.E.M. Statistical analysis for gene expression by RT-PCR was carried out using the Mann-Whitney U Test and Prism software.



## RESULTS

### Pharmacological treatment inhibited gill filament regeneration

Over the course of 5 days following the gill resection procedure, we observed normal regeneration of gill filaments, including the distal extension of the gill filament at the gross morphological level (Fig. 1A, B), and regrowth of the filament tip at higher magnification (Fig. 2A, B). Our observations were similar to those previously described for gill regeneration in zebrafish (Jonz et al., 2015; Mierzwa et al., 2020). For animals that were exposed to chemicals that targeted specific receptor types involved in regeneration or development, wound closure did not appear to be affected, but regrowth of the filament tip was reduced at 5 d.p.r. Compared to zebrafish kept in system water or DMSO controls, zebrafish that were treated with SU5402, DMD or LY411575 displayed a negative effect of drug treatment upon the development of new tissue at the filament tip (Fig. 1C–E, Fig. 2C–E). At the concentrations tested, LY411575 had the greatest effect and produced a filament tip with a mean area of  $1,778 \pm 268.5 \mu\text{m}^2$ , significantly smaller compared to  $8,081 \pm 292.0 \mu\text{m}^2$  in DMSO controls (Fig. 2F;  $F=56.97$ ,  $P<0.05$ ;  $N=10$ ). This was a 4.5-fold reduction compared to controls. SU5402 and DMD also caused the reduction of filament tip area in regenerating gills to  $4,093 \pm 371.4 \mu\text{m}^2$  and  $3,479 \pm 451.8 \mu\text{m}^2$ , a 2.0-fold and 2.3-fold difference, respectively, compared to DMSO controls (Fig. 2F;  $F=56.97$ ,  $P<0.05$ ;  $N=10$ ).

### Gene expression in regenerating filaments

Based on results from chemical exposure experiments, which demonstrated a reduction in regrowth of filament tips by inhibition of FGF, BMP or Notch signalling, we further implicated these as important pathways involved in gill regeneration by quantifying relative expression of the genes, *fgf8a*, *bmp2b*, *bmp6*, *her6* and *jag1b* using RT-PCR. All five genes were expressed in the gills in both controls and regenerating tissue (Fig. 3). In zebrafish that had undergone the resection procedure, the relative abundance of *fgf8a*, *bmp2b* and *her6* significantly increased in the gills at 10 d.p.r., compared to unresected controls (Fig. 3A, B, D; Mann-Whitney U Test;  $U=0$ ,  $P<0.01$ ;  $N=8$ ). Increases in abundance of these transcripts ranged from 4.3-fold for *bmp2b* to 10.9-fold for *her6*.

Our next goal was to identify regions of gene expression in the gills using *in situ* hybridization (Fig. 4). Gene expression was below the level of detection in the distal region of



gill filaments in unresected animals, but we observed clear expression of *fgf8a*, *bmp2b* and *her6* near the site of resection in gill filaments that were undergoing regeneration (Fig. 4B, C, E). Regions of expression of these genes corresponded to the site of formation of new tissue at the distal tips of the filaments.

Investigation of *shha* expression was included in this analysis because of the established role of this gene in regeneration, and because *shha* is specifically expressed in gill cells that undergo proliferation, such as chemoreceptors (Pan et al., 2022). RT-PCR demonstrated that *shha* was expressed in the gills in both controls and regenerating filaments (Fig. 5A). In zebrafish that had undergone the resection procedure, the relative abundance of *shha* significantly increased in the gills at 10 d.p.r., compared to unresected controls (Fig. 5A; Mann-Whitney U Test; U=0, P<0.01; N=8). Using *in situ* hybridization, intense labelling of *shha* was found in regenerating filament tips, as well as along the filament epithelium proximal to the site of resection (Fig. 5B). Weak labelling was also found along the filament epithelium in unresected controls (Fig. 5C), suggesting that *shha* expression was not limited to regenerating tissue in the gill.

## DISCUSSION

The present study used chemical exposures and gene expression analysis to identify signalling pathways involved in gill regeneration in zebrafish. While all genes tested were expressed in the gills, we demonstrated an increase in the relative abundance of four genes—*fgf8a*, *bmp2b*, *her6* and *shha*—in regenerating filaments and provide evidence for a role for FGF, BMP, Notch and Shh signalling in gill regeneration.

Development and growth of the gills in fish is well described in the literature (e.g. Morgan, 1974; Rombough, 1988; Kimmel et al., 1995; Evans et al., 2005; Jonz and Nurse, 2005; Fu et al., 2010; Hwang and Chou, 2013; Mongera et al., 2013; Kwong and Perry, 2015; Gillis and Tidswell, 2017; DeLaurier, 2018; Stolper et al., 2019; Lelièvre et al., 2023). By contrast, the regenerative potential of the gill is just beginning to be described at the cellular and molecular level. In zebrafish, gill regeneration begins immediately after gill filament resection or amputation and results in formation of a blastema at the filament tip within 24 h (Mierzwa et al., 2020). Approximately half of resected gill tissue is replaced by 40 d.p.r., and about 85% is

replaced by 160 d.p.r. Regeneration includes a return to normal gill morphology, including vascularization, perfusion, innervation, and the return of multiple cell types, such as chemoreceptors, neurons and ionocytes (Mierzwa et al., 2020; Nguyen and Jonz, 2021).

In the present study, we used a pharmacological approach to identify signalling pathways potentially involved in mediating gill regeneration. Each drug partially reduced or delayed regrowth of tissue at the filament tip, indicating that multiple pathways are likely involved in the regenerative process. SU5402 inhibits enzymatic activity of receptor tyrosine kinases, including FGFR1 receptors, and has been shown to impair blastema formation, and fin and muscle regeneration in zebrafish (Poss et al., 2000; Saera-Vila et al., 2016). In the gills, we found that SU5402 reduced growth of a new filament tip to about half of its normal size. Multiple types of FGF receptors, including *fgfr1*, *fgfr2*, *fgfr3* and *fgfr4*, are expressed in the zebrafish gill and were localized to cell types, such as fibroblasts, endothelial cells and pavement cells (Pan et al., 2022). These receptors may represent potential targets of SU5402 activity. Our demonstration of *fgf8a* expression within the regenerating region suggests that Fgf8 may be an endogenous regulator of gill regeneration at the site of resection. Fgf8 has been shown to be involved in development of the branchial arches and head in zebrafish (Crump et al., 2004; Gebuijs et al., 2019), and gill regeneration in axolotl (Saito et al., 2019).

Dorsomorphin is a highly-selective inhibitor of BMP type I receptors that perturbs embryogenesis in zebrafish when applied *in vivo* (Yu et al., 2008). In addition, the gene encoding its ligand, *bmp2b*, is required for organogenesis in zebrafish (Chung et al., 2008) and has already been implicated in gill regeneration in axolotl (Saito et al., 2019). The present study demonstrated that DMD significantly reduced filament regrowth in the gill, and we localized expression of *bmp2b* specifically to the site of regeneration. Given the recent report of expression of *acvr1l1*, a gene encoding a subtype of BMP type I receptors, in the zebrafish gill (Pan et al., 2022), the BMP pathway represents a likely candidate for regulation of gill regeneration in zebrafish.

We used LY411575 as a  $\gamma$  secretase inhibitor to block the Notch signalling cascade. This drug was used in a previous study to demonstrate that Notch signalling is required for the proliferation of blastema cells during fin regeneration, where they also found robust expression of *her6*—a gene encoding a Notch effector protein—confined to the proliferative zone of the blastema (Grotek et al., 2013). *her6* has also been implicated in neurogenesis and bone formation

during mandibular regeneration in zebrafish (Ueda et al., 2018; Kraus et al., 2022). In agreement with Grotek et al. (2013), we found that LY411575 almost entirely inhibited gill filament regrowth. Consistent with the dramatic effects of Notch inhibition, under normal conditions of regeneration we report a 10.9-fold increase in relative abundance of *her6* in regenerating tissue compared to the intact gill, and intense expression of this gene that was confined to the filament tip at 10 d.p.r. Interestingly, using single-cell RNA-sequencing, *her6* expression was shown in cells of the zebrafish gill, such as endothelial cells and fibroblasts, and *her6* expression increased in the gills following *in vivo* exposure to hypoxia (Pan et al., 2022), a stimulus known to induce cell proliferation or growth in gill cells (Jonz et al., 2004; Regan et al., 2011; Porteus et al., 2014). Together, these data argue strongly for a role for Notch signalling in gill regeneration by mediating blastema cell proliferation.

Investigation of potential Shh signalling was included in the present study because of its important role in regeneration of multiple tissues in zebrafish, and its role in cell proliferation and neurogenesis (Laforest et al., 1998; Armstrong et al., 2017; Dunaeva and Waltenberger, 2017; Thomas et al., 2018; Ueda et al., 2018; Iwasaki et al., 2018). From our *in situ* hybridization experiments, we show that *shha* staining increased within the regenerating filament tip at 10 d.p.r., and this was in line with our gene expression analysis that indicated an increase in the relative abundance of *shha* in regenerating gills. However, we also observed weak *shha* staining along the length of the gill filaments in both unresected controls and regenerating filaments. This suggests that, while *shha* may participate in gill regeneration at the filament tip, it must also play another role elsewhere in the gill. Interestingly, RNA-sequencing data indicated that *shha* was expressed only in chemoreceptive neuroepithelial cells (Pan et al., 2022). Neuroepithelial cells in the gills are found along the length of the gill filament and at the tip, and function as sensors of hypoxia (Jonz et al., 2003; Jonz et al., 2004). As part of their role in initiating acclimatization to low environmental oxygen, gill neuroepithelial cells proliferate and undergo hypertrophy when confronted with chronic hypoxia (Jonz et al., 2004; Pan et al., 2021). Given the role of Shh in mediating cell proliferation, future studies may seek to identify whether Shh may be important in regulating the population of oxygen chemoreceptors in the gills. Another possibility is that expression of *shha* along the length of the gill filament represents regions of constitutive cell proliferation to maintain multiple cell populations. Stolper et al. (2019) identified homeostatic

stem cells along the gill filaments in medaka, and similar mitotic cells were labelled with antibodies against the proliferating cell nuclear antigen in zebrafish (Mierzwa et al., 2020).

We have demonstrated that multiple pathways are involved in gill regeneration in zebrafish, and have presented evidence that identifies a role for FGF, BMP, Notch and Shh signalling in mediating this process. The molecular basis of gill regeneration in fish is still in its early stages. Continued studies on gill regeneration will improve our understanding of cell proliferation and tissue replacement in the gills following injury or disease in fish. Moreover, many of the genetic pathways that promote gill and lung regeneration appear to be highly conserved in vertebrates. For example, in mammalian lung, BMP signalling is critical for stem cell activation and differentiation following damage (Chung et al., 2018), whereas FGF promotes tissue repair in the lung after injury (Finch et al., 2013). In addition, Notch controls epithelial cell transdifferentiation in the injured lung (Kiyokawa and Morimoto, 2020). Given the regenerative capacity of the zebrafish gill, and the genetic tools available for this model vertebrate, future research on gill regeneration in zebrafish may lead to a better understanding of the relatively limited regenerative potential of the lung, which may lead to new developments in treating human lung disease.

### **Competing interests**

The authors declare no competing or financial interests.

### **Author contributions**

Conceptualization: M.G.J., L.C.; Methodology: all authors; Validation: L.C., M.R.; Formal analysis: L.C., M.R.; Investigation: all authors; Resources: M.G.J., M.A.A.; Data curation: L.C., M.R.; Writing - original draft: M.G.J., L.C., M.R.; Writing - review & editing: all authors; Supervision: M.G.J., M.A.A.; Project administration: M.G.J.; Funding acquisition: M.G.J.

### **Funding**

This research was supported by Natural Sciences and Engineering Research Council of Canada (NSERC) grants no. 342303 and 05571 to M.G.J.

## Data availability

All relevant data can be found within the article and its supplementary information.

## References

- Armstrong, B. E., Henner, A., Stewart, S. and Stankunas, K.** (2017). Shh promotes direct interactions between epidermal cells and osteoblast progenitors to shape regenerated zebrafish bone. *Development* **144**, 1165-1176. doi: 10.1242/dev.143792
- Beers, M. F. and Morrissey, E. E.** (2011). The three R's of lung health and disease: repair, remodeling, and regeneration. *J. Clin. Invest.* **121**, 2065-2073. doi:10. 1172/JCI45961
- Burkhardt-Holm, P., Oulmi, Y., Schroeder, A., Storch, V. and Braunbeck, T.** (1999). Toxicity of 4-chloroaniline in early life stages of zebrafish (*Danio rerio*): II. Cytopathology and regeneration of liver and gills after prolonged exposure to waterborne 4-chloroaniline. *Arch. Environ. Contam. Toxicol.* **37**, 85-102.
- Cadiz, L. and Jonz, M.G.** (2020). A comparative perspective on lung and gill regeneration. *J. Exp. Biol.* **223**:jeb226076. doi: 10.1242/jeb.226076
- Chung, W. S., Shin, C. H. and Stainier, D. Y.** (2008). Bmp2 signaling regulates the hepatic versus pancreatic fate decision. *Dev. Cell.* **15**, 738-748. doi: 10.1016/j.devcel.2008.08.019.
- Chung, M.-I., Bujnis, M., Barkauskas, C. E., Kobayashi, Y. and Hogan, B. L. M.** (2018). Niche-mediated BMP/SMAD signaling regulates lung alveolar stem cell proliferation and differentiation. *Development* **145**(9):dev163014. doi:10.1242/dev. 163014
- Crump, J. G., Maves, L., Lawson, N. D., Weinstein, B. M. and Kimmel, C. B.** (2004). An essential role for Fgfs in endodermal pouch formation influences later craniofacial skeletal patterning. *Development* **131**, 5703-5716. doi:10.1242/dev. 01444

**DeLaurier, A.** (2019). Evolution and development of the fish jaw skeleton. *Wiley Interdiscip. Rev. Dev. Biol.* **8**(2):e337. doi: 10.1002/wdev.337

**Dunaeva, M., Waltenberger, J.** (2007). Hh signaling in regeneration of the ischemic heart. *Cell. Mol. Life Sci.* **74**, 3481-3490. doi: 10.1007/s00018-017-2534-9

**Dutta, H. M., Munshi, J. S., Roy, P. K., Singh, N. K., Adhikari, S. and Killius, J.** (1996). Ultrastructural changes in the respiratory lamellae of the catfish, *Heteropneustes fossilis* after sublethal exposure to malathion. *Environ. Pollut.* **92**, 329-341.

**Evans, D. H., Piermarini, P. M., Choe, K. P.** (2005). The multifunctional fish gill: dominant site of gas exchange, osmoregulation, acid-base regulation, and excretion of nitrogenous waste. *Physiol. Rev.* **85**, 97-177.

**Eycleshymer, A.C.** (1906). The growth and regeneration of the gills in the young *Necturus*. *Biol. Bull.* **10**, 171-175.

**Finch, P. W., Mark Cross, L. J., McAuley, D. F. and Farrell, C. L.** (2013). Palifermin for the protection and regeneration of epithelial tissues following injury: new findings in basic research and pre-clinical models. *J. Cell Mol. Med.* **17**, 1065-1087. doi: 10.1111/jcmm.12091

**Fu, C., Wilson, J. M., Rombough, P. J. and Brauner, C. J.** (2010). Ions first: Na<sup>+</sup> uptake shifts from the skin to the gills before O<sub>2</sub> uptake in developing rainbow trout, *Oncorhynchus mykiss*. *Proc. Biol. Sci.* **277**, 1553-1560. doi: 10.1098/rspb.2009.1545

**Gebuijs, I. G. E., Raterman, S. T., Metz, J. R., Swanenberg, L., Zethof, J., Van den Bos, R., Carels, C. E. L., Wagener, F. A. D. T. G. and Von den Hoff, J. W.** (2019). *Fgf8a* mutation affects craniofacial development and skeletal gene expression in zebrafish larvae. *Biol. Open* **8**(9), bio039834. doi: 10.1242/bio.039834

**Gillis, J. A. and Tidswell, O. R. A.** (2017). The origin of vertebrate gills. *Curr. Biol.* **27**, 729-732. doi:10.1016/j.cub.2017.01.022

**Grotek, B., Wehner, D. and Weidinger, G.** (2013). Notch signaling coordinates cellular proliferation with differentiation during zebrafish fin regeneration. *Development* **140**, 1412-1423. doi: 10.1242/dev.087452

**Hemalatha, S., Banerjee and T.K.** (1997). Histopathological analysis of sublethal toxicity of zinc chloride to the respiratory organs of the airbreathing catfish *Heteropneustes fossilis* (Bloch). *Biol. Res.* **30**, 11-21.

**Hockman, D., Burns, A. J., Schlosser, G., Gates, K. P., Jevans, B., Mongera, A., Fisher, S., Unlu, G., Knapik, E. W., Kaufman, C. K., Mosimann, C., Zon, L. I., Lancman, J. J., Dong, P. D. S., Lickert, H., Tucker, A. S. and Baker, C. V.** (2017). Evolution of the hypoxia-sensitive cells involved in amniote respiratory reflexes. *eLife* **6**, e21231. doi:10.7554/eLife.21231

**Huang, V., Butler, A. A. and Lubin, F. D.** (2019). Telencephalon transcriptome analysis of chronically stressed adult zebrafish. *Sci. Rep.* **9**(1):1379. doi: 10.1038/s41598-018-37761-7

**Hughes, G. M.** (1984). General anatomy of the gills. In *Fish Physiology*, vol. XA (ed. W. S. Hoar and D. J. Randall), pp. 1-72. San Diego, Academic Press.

**Hwang, P. P. and Chou, M. Y.** (2013). Zebrafish as an animal model to study ion homeostasis. *Pflügers Arch.* **465**, 1233-1247. doi: 10.1007/s00424-013-1269-1

**Iwasaki, M., Kuroda, J., Kawakami, K. and Wada, H.** (2018). Epidermal regulation of bone morphogenesis through the development and regeneration of osteoblasts in the zebrafish scale. *Dev. Biol.* **437**, 105-119. doi: 10.1016/j.ydbio.2018.03.005



**Jonz, M. G. and Nurse, C. A.** (2003). Neuroepithelial cells and associated innervation of the zebrafish gill: a confocal immunofluorescence study. *J. Comp. Neurol.* **461**, 1-17. doi: 10.1002/cne.10680

**Jonz, M. G. and Nurse, C. A.** (2005). Development of oxygen sensing in the gills of zebrafish. *J. Exp. Biol.* **208**, 1537-1549. doi: 10.1242/jeb.01564

**Jonz, M. G., Fearon, I. M. and Nurse, C. A.** (2004). Neuroepithelial oxygen chemoreceptors of the zebrafish gill. *J. Physiol.* **560**, 737-752.

**Jonz, M. G., Zachar, P. C., Da Fonte, D. F. and Mierzwa, A. S.** (2015). Peripheral chemoreceptors in fish: A brief history and a look ahead. *Comp. Biochem. Physiol. A Mol. Integr. Physiol.* **186**, 27-38.

**Kimmel, C. B., Ballard, W. W., Kimmel, S. R., Ullmann, B., Schilling, T.F.** (1995). Stages of embryonic development of the zebrafish. *Dev. Dyn.* **203**, 253-310.

**Kiyokawa, H. and Morimoto, M.** (2020). Notch signaling in the mammalian respiratory system, specifically the trachea and lungs, in development, homeostasis, regeneration, and disease. *Dev. Growth Differ.* **62**, 67-79. doi:10.1111/dgd.12628

**Kotton, D. N. and Morrissey, E. E.** (2014). Lung regeneration: mechanisms, applications and emerging stem cell populations. *Nat. Med.* **20**, 822-832. doi:10.1038/nm.3642

**Kraus, J. M., Giovannone, D., Rydzik, R., Balsbaugh, J. L., Moss, I. L., Schwedler, J. L., Bertrand, J. Y., Traver, D., Hankenson, K. D, Crump, J. G. and Youngstrom, D. W.** (2022). Notch signaling enhances bone regeneration in the zebrafish mandible. *Development* **149**(5):dev199995. doi: 10.1242/dev.199995

- Kwong, R. W. and Perry, S. F.** (2015). An essential role for parathyroid hormone in gill formation and differentiation of ion-transporting cells in developing zebrafish. *Endocrinology* **156**, 2384-2394. doi: 10.1210/en.2014-1968
- Laforest, L., Brown, C. W., Poleo, G., Géraudie, J., Tada, M., Ekker, M. and Akimenko, M.A.** (1998). Involvement of the sonic hedgehog, patched 1 and bmp2 genes in patterning of the zebrafish dermal fin rays. *Development* **125**, 4175-4184. doi: 10.1242/dev.125.21.4175
- Lelièvre, E., Bureau, C., Bordat, Y., Frénaud, M., Langevin, C., Jopling, C. and Kissa, K.** (2023). Deficiency in HHT-associated Endoglin elicits hypoxia-driven congestive heart failure in zebrafish. *Dis. Model Mech.* **9**:dmm.049488. doi: 10.1242/dmm.049488
- Li, C. W. and Ge, W.** (2011). Spatiotemporal expression of bone morphogenetic protein family ligands and receptors in the zebrafish ovary: a potential paracrine-signaling mechanism for oocyte-follicle cell communication. *Biol. Reprod.* **85**, 977-986. doi: 10.1095/biolreprod.111.092239
- Livak, K.J. and Schmittgen, T. D.** (2001). Analysis of relative gene expression data using real-time quantitative PCR and the  $2^{-\Delta\Delta CT}$  Method. *Methods* **25**, 402-408.
- Ma, W. R. and Zhang, J.** (2015). Jag1b is essential for patterning inner ear sensory cristae by regulating anterior morphogenetic tissue separation and preventing posterior cell death. *Development* **142**, 763-773. doi: 10.1242/dev.113662
- Mierzwa, A. S., Nguyen, F., Xue, M. and Jonz, M. G.** (2020). Regeneration of the gill filaments and replacement of serotonergic neuroepithelial cells in adult zebrafish (*Danio rerio*). *Respir. Physiol. Neurobiol.* **274**:103366. doi: 10.1016/j.resp.2019.103366

**Mongera, A., Singh, A. P., Levesque, M. P., Chen, Y. Y., Konstantinidis, P. and Nüsslein-Volhard, C.** (2013). Genetic lineage labeling in zebrafish uncovers novel neural crest contributions to the head, including gill pillar cells. *Development* **140**, 916-925. doi: 10.1242/dev.091066

**Morgan, M.** (1974). Development of secondary lamellae of the gills of the trout, *Salmo gairdneri* (Richardson). *Cell Tissue Res.* **151**, 509-523.

**Nesan, D., Kamkar, M., Burrows, J., Scott, I., Marsden, M. and Vijayan, M.** (2012). Glucocorticoid receptor signaling is essential for mesoderm formation and muscle development in zebrafish. *Endocrinology* **153**, 1288-1300. doi:10.1210/en.2011-1559

**Nguyen, F. and Jonz, M. G.** (2021). Replacement of mitochondrion-rich cells during regeneration of the gills and opercular epithelium in zebrafish (*Danio rerio*). *Acta Histochem.* **123**(5):151738. doi: 10.1016/j.acthis.2021.151738.

**Nye, H. L. D., Cameron, J. A., Chernoff, E. A. G. and Stocum, D. L.** (2003). Regeneration of the urodele limb: a review. *Dev. Dyn.* **226**, 280-294. doi:10.1002/dvdy.10236

**Pan, W., Scott, A. L., Nurse, C. A. and Jonz, M. G.** (2021). Identification of oxygen-sensitive neuroepithelial cells through an endogenous reporter gene in larval and adult transgenic zebrafish. *Cell Tissue Res.* **384**, 35-47. doi: 10.1007/s00441-020-03307-5

**Pan, W., Godoy, R. S., Cook, D. P., Scott, A. L., Nurse, C. A. and Jonz, M. G.** (2022). Single-cell transcriptomic analysis of neuroepithelial cells and other cell types of the gills of zebrafish (*Danio rerio*) exposed to hypoxia. *Sci. Rep.* **12**(1):10144. doi: 10.1038/s41598-022-13693-1

**Porteus, C. S., Wright, P. A. and Milsom, W. K.** (2014). Characterisation of putative oxygen chemoreceptors in bowfin (*Amia calva*). *J. Exp. Biol.* **217**, 1269-1277.

**Poss, K. D., Shen, J. and Keating, M. T.** (2000). Induction of *lef1* during zebrafish fin regeneration. *Dev. Dyn.* **219**, 282-286.

**Regan, K. S., Jonz, M. G. and Wright, P. A.** (2011). Neuroepithelial cells and the hypoxia emersion response in the amphibious fish *Kryptolebias marmoratus*. *J. Exp. Biol.* **214**, 2560-2568.

**Reynolds, S. D., Giangreco, A., Power, J. H. T. and Stripp, B. R.** (2000). Neuroepithelial bodies of pulmonary airways serve as a reservoir of progenitor cells capable of epithelial regeneration. *Am. J. Pathol.* **156**, 269-278. doi:10.1016/S0002-9440(10)64727-X

**Robertson, C. E., Wright, P. A., Köblitz, L. and Bernier, N. J.** (2014). Hypoxia-inducible factor-1 mediates adaptive developmental plasticity of hypoxia tolerance in zebrafish, *Danio rerio*. *Proc. Biol. Sci.* **281**(1786):20140637. doi: 10.1098/rspb.2014.0637

**Rombough, P. J.** (1988). Respiratory gas exchange, aerobic metabolism, and effects of hypoxia during early life. In *Fish Physiology, Vol XIA* (ed. W. S. Hoar and D. J. Randall), pp. 59-161. New York, London: Academic Press.

**Saera-Vila, A., Kish, P. E. and Kahana, A.** (2016). Fgf regulates dedifferentiation during skeletal muscle regeneration in adult zebrafish. *Cell Signal.* **28**(9):1196-1204.

**Saito, N., Nishimura, K., Makanae, A. and Satoh, A.** (2019). Fgf- and Bmp-signaling regulate gill regeneration in *Ambystoma mexicanum*. *Dev. Biol.* **452**, 104-113. doi: 10.1016/j.ydbio.2019.04.011

**Schäfer, L.W.** (1936). Die Regeneration der Kiemen und Flossenstrahlen beim Goldfisch (*Carassius auratus*). *Jena. Z. Naturw.* **70**, 303-358.

**Schebesta, M., Lien, C. L., Engel, F. B. and Keating, M. T.** (2006). Transcriptional profiling of caudal fin regeneration in zebrafish. *ScientificWorldJournal* 6 Suppl 1, 38-54. doi: 10.1100/tsw.2006.326

**Schittny, J. C.** (2017). Development of the lung. *Cell Tissue Res.* **367**, 427-444. doi:10.1007/s00441-016-2545-0

**Schneider, C.A., Rasband, W.S. and Eliceiri, K.W.** (2012). NIH Image to ImageJ: 25 years of image analysis. *Nat. Methods* **9**, 671-675.

**Smith, A., Avaron, F., Guay, D., Padhi, B. K. and Akimenko, M. A.** (2006). Inhibition of BMP signaling during zebrafish fin regeneration disrupts fin growth and scleroblasts differentiation and function. *Dev. Biol.* **299**, 438-454.

**Stocum, D. L.** (2017). Mechanisms of urodele limb regeneration. *Regeneration* **4**, 159-200. doi:10.1002/reg2.92

**Stolper, J., Ambrosio, E. M., Danciu, D. P., Buono, L., Elliott, D. A., Naruse, K., Martínez-Morales, J. R., Marciniak-Czochra, A. and Centanin, L.** (2019). Stem cell topography splits growth and homeostatic functions in the fish gill. *Elife* **16**;8:e43747. doi: 10.7554/eLife.43747

**Sugimoto, K., Hui, S. P., Sheng, D. Z. and Kikuchi, K.** (2017). Dissection of zebrafish *shha* function using site-specific targeting with a Cre-dependent genetic switch. *Elife* **6**:e24635. doi: 10.7554/eLife.24635.

**Thisse, C. and Thisse, B.** (2008). High-resolution *in situ* hybridization to whole-mount zebrafish embryos. *Nat. Protoc.* **3**, 59-69.

**Thomas, J. L., Morgan, G. W., Dolinski, K. M. and Thummel, R.** (2018). Characterization of the pleiotropic roles of Sonic Hedgehog during retinal regeneration in adult zebrafish. *Exp. Eye Res.* **166**, 106-115. doi: 10.1016/j.exer.2017.10.003

**Ueda, Y., Shimizu, Y., Shimizu, N., Ishitani, T. and Ohshima, T.** (2018). Involvement of sonic hedgehog and notch signaling in regenerative neurogenesis in adult zebrafish optic tectum after stab injury. *J. Comp. Neurol.* **526**, 2360-2372. doi: 10.1002/cne.24489

**Wilson, J. M., Laurent, P.** (2008). Fish gill morphology: inside out. *J. Exp. Zool.* **293**, 192-213. doi: 10.1002/jez.10124. PMID: 12115897

**Yu, P. B., Hong, C. C., Sachidanandan, C., Babitt, J. L., Deng, D. Y., Hoyng, S. A., Lin, H. Y., Bloch, K. D. and Peterson, R. T.** (2008). Dorsomorphin inhibits BMP signals required for embryogenesis and iron metabolism. *Nat. Chem. Biol.* **4**, 33-41.

**Zhang, J., Wagh, P., Guay, D., Sanchez-Pulido, L., Padhi, B. K., Korzh, V., Andrade-Navarro, M. A. and Akimenko, M. A.** (2010). Loss of fish actinotrichia proteins and the fin-to-limb transition. *Nature* **466**, 234-237. doi: 10.1038/nature09137

**Zuniga, E., Stellabotte, F. and Crump, J. G.** (2010). Jagged-Notch signaling ensures dorsal skeletal identity in the vertebrate face. *Development* **137**, 1843-1852. doi: 10.1242/dev.049056

## Figures

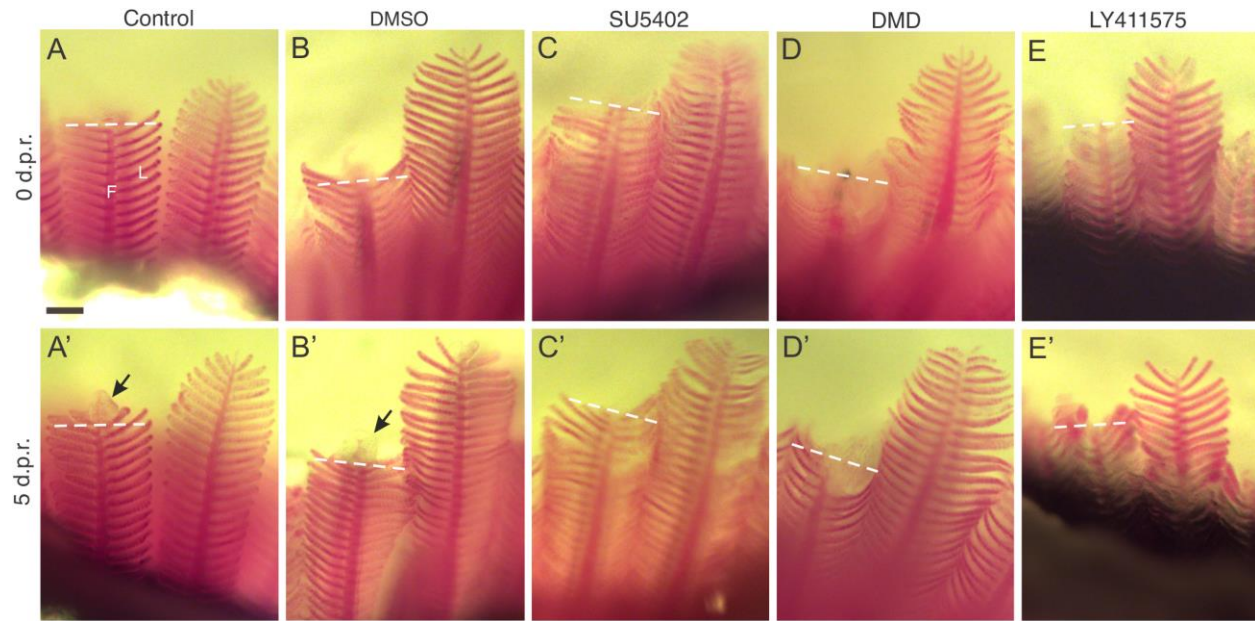

**Fig. 1. Pharmacological inhibitors restricted regeneration of the gill filaments.** *In vivo* tracking of 5 individual zebrafish exposed to system water (A) or DMSO (B) as controls, or to SU5402 (C), dorsomorphin, DMD (D), or LY411575 (E). Gill filaments are shown immediately after the resection procedure (A–E) and again from the same individual at 5 days post-resection, d.p.r. (A'–E'). In all images, the dashed line indicates the site of resection. Development of a new filament tip (*arrows*) was observed only in controls (A', B') at this magnification. F, filament; L, lamella. Scale bar = 100  $\mu$ m and applies to all panels.



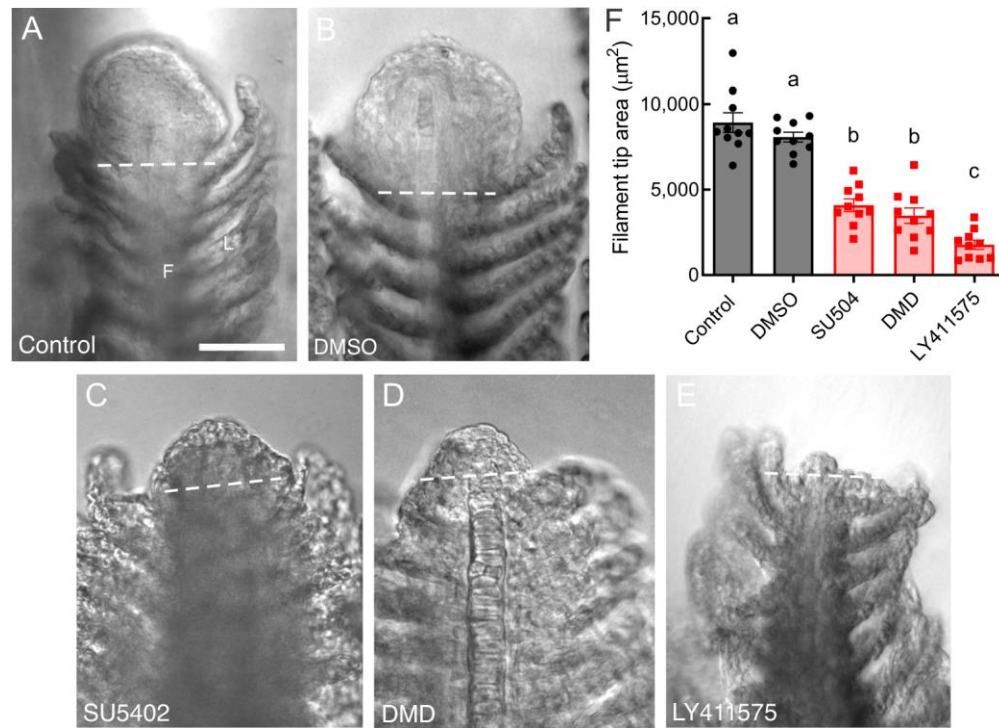

**Fig. 2. Pharmacological inhibitors reduced the area of gill filament regrowth during regeneration.** The distal tips of gill filaments from zebrafish exposed to water (A) or DMSO (B) as controls, or to SU5402 (C), dorsomorphin, DMD (D), or LY411575 (E) are shown at 5 days post-resection (d.p.r.). A large region of tissue regrowth was observed in controls (A, B) but was reduced in drug treatment groups. In all images, the dashed line indicates the site of resection. F, filament; L, lamella. Scale bar = 50  $\mu\text{m}$  and applies to all panels. (F) Summary data showing mean  $\pm$  s.e.m. area of the filament tip (in  $\mu\text{m}^2$ ) at 5 d.p.r. for control and DMSO groups (*circles*), and for drug treatment groups (*squares*). Data were analyzed by one-way ANOVA and Tukey's test ( $F=56.97$ ,  $P<0.05$ ;  $N=10$  for each group). Significant differences between groups are indicated by different lower case letters.

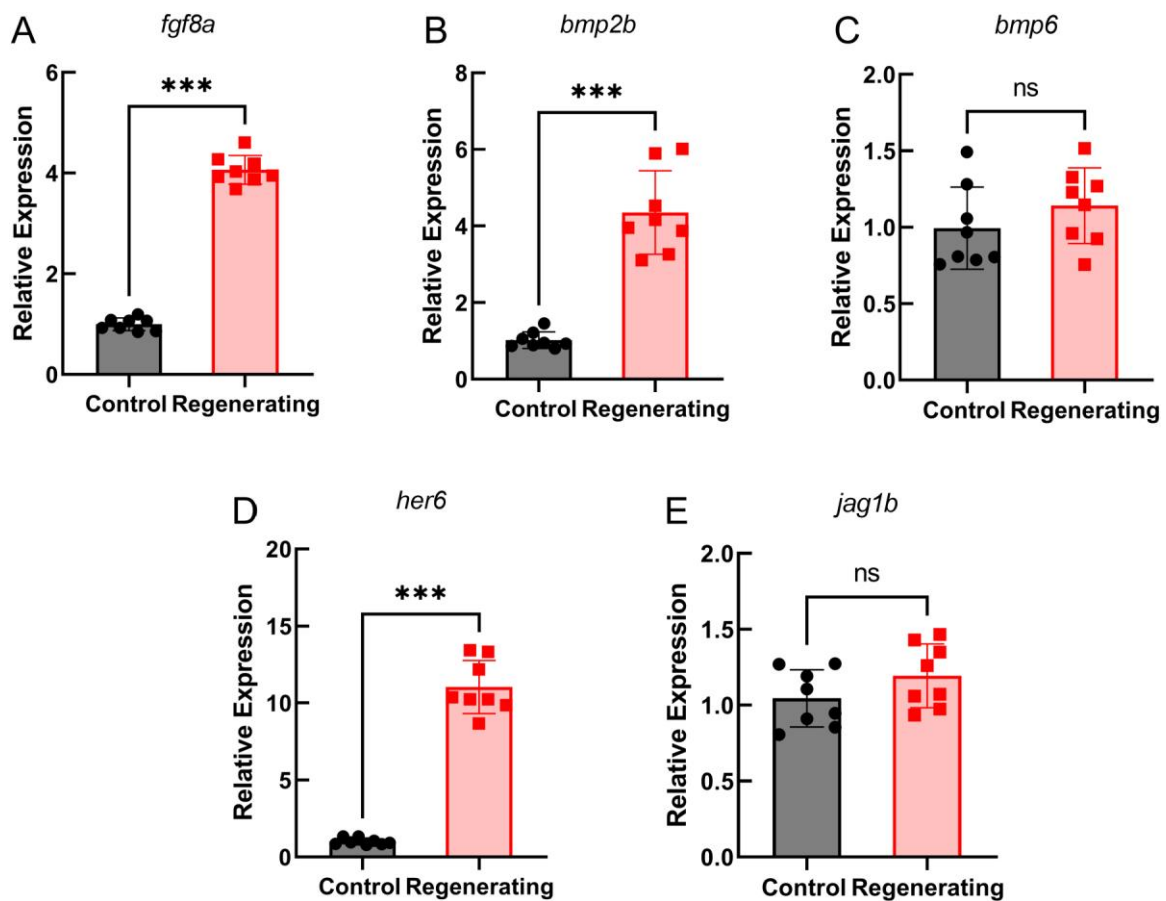

**Fig. 3. Gene expression analysis in regenerating gill filaments using RT-PCR.** Relative mRNA expression of (A–E) *fgf8a*, *bmp2b*, *bmp6*, *her6* and *jag1b* in regenerating gills of zebrafish 10 days after the resection procedure (*squares*), compared to expression in gills from intact animals (*circles*). Expression of all genes was observed under control conditions, but relative abundance increased during regeneration for only *fgf8a*, *bmp2b* and *her6*. Data were normalized to the mRNA abundance of the reference gene, *ef1a*. Data were analyzed using the Mann-Whitney U Test (two-tailed) and means  $\pm$  s.e.m. significantly different from control are indicated by asterisks (U=0,  $P<0.01$ ; N=8 for each group). ns = not significant.

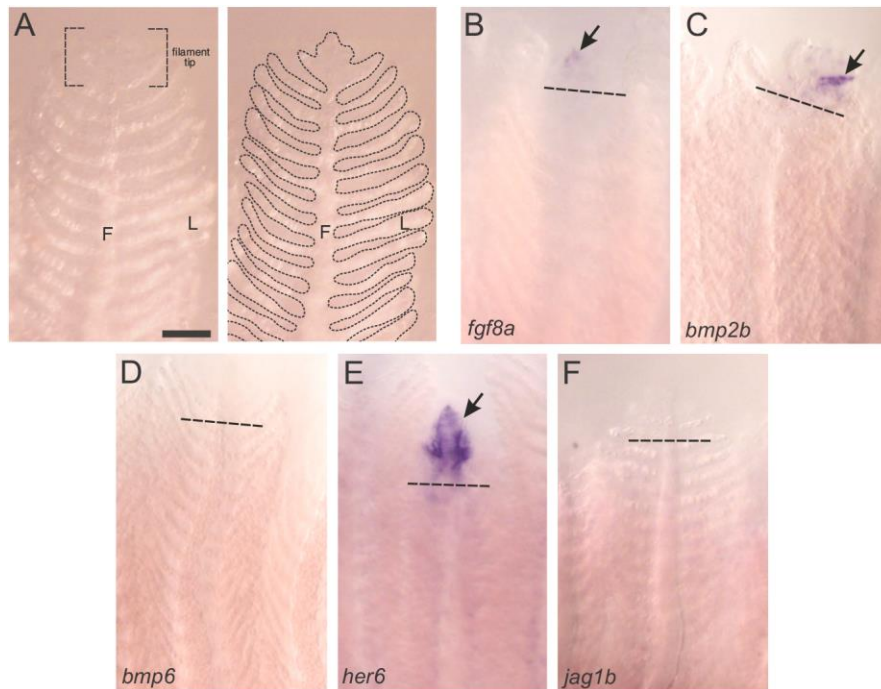

**Fig. 4. Gene expression in regenerating gill filaments as shown by *in situ* hybridization.** (A) Micrograph of an intact gill filament. In the left panel, the structural filament (F) and numerous respiratory lamellae (L) are shown, as well as the filament tip. In the right panel, the morphology of the gill is outlined for clarity, and approximately corresponds to other panels. The distal tips of previously-resected gill filaments at 10 days post-resection (d.p.r.) were stained for expression of (B–F) *fgf8a*, *bmp2b*, *bmp6*, *her6* and *jag1b*. Dashed lines indicate the site of resection. Gene expression (arrows) was detected in the regenerating filament tips in panels B, C and E. Scale bar = 100  $\mu$ m and applies to all panels.

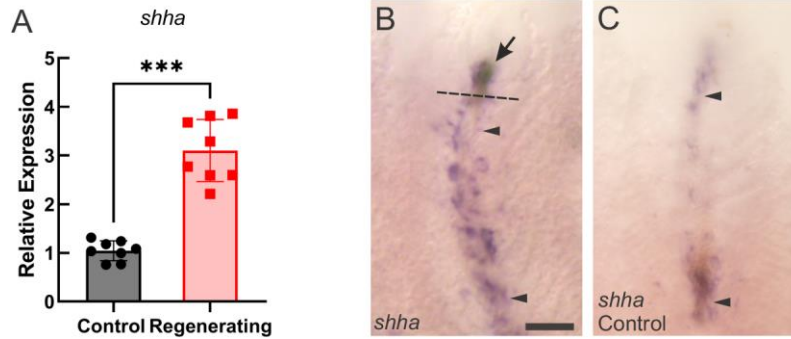

**Fig. 5.** Expression of *shha* in regenerating gill filaments. (A) Demonstration by RT-PCR of relative mRNA expression of *shha* in regenerating gills of zebrafish 10 days after the resection procedure (*squares*), compared to expression in gills from intact animals (*circles*). Expression was observed under control conditions, but relative abundance increased during regeneration. Data were normalized to the mRNA abundance of the reference gene, *ef1a*, and analyzed using the Mann-Whitney U Test (two-tailed). The mean  $\pm$  s.e.m. significantly different from control is indicated by asterisks ( $U=0$ ,  $P<0.01$ ;  $N=8$  for each group). (B, C) *In situ* hybridization demonstrated expression of *shha* along the length of the filaments (*region between arrowheads*) in regenerating filaments (B) and in unresected controls (C), in addition to the increased expression in regenerating tissue (*arrow*) in (B). Scale bar = 100  $\mu$ m and applies to both panels.

**Table S1.** Primer pairs used for mRNA quantification by RT-PCR.

| Gene                                  | Primer Sequence (5'-3')                             | Reference              |
|---------------------------------------|-----------------------------------------------------|------------------------|
| <i>fgf8a</i>                          | F: GCCGTAGACTAATCCGGACC<br>R: TTGTTGGCCAGAACTTGCAC  | Gebuijs et al., 2019   |
| <i>bmp2b</i>                          | F: AGGCTGGAATGACTGGATTG<br>R: TTGCTGTTCACCGAGTTCAC  | Nesan et al., 2012     |
| <i>bmp6</i>                           | F: AACCGCAACCGCTCCAATAG<br>R: AACGCACCACCATGTTTCCTG | Li and Ge, 2011        |
| <i>her6</i>                           | F: TGAACTCGGGACACTTCGTG<br>R: GCACAGCTGCTTCTAGTGGA  | Huang et al., 2019     |
| <i>jag1b</i>                          | F: CGCTAAGTCATGCCACAA<br>R: TCCACATCCTTCTCACACT     | Ma and Zhang, 2015     |
| <i>shha</i>                           | F: AAGCCCACATTCATTGCTCT<br>R: CCTCTGTCCTCCGTCCTG    | Sugimoto et al., 2017  |
| <i>efla</i>                           | F: GGGCAAGGGCTCCTTCAA<br>R: CGCTCGGCCTTCAGTTTG      | Robertson et al., 2014 |
| F: forward primer, R: reverse primer. |                                                     |                        |
